# Supplementary material for: XomAnnotate: Analysis of Heterogeneous and Complex Exome- A Step towards Translational Medicine
Source: PubMed Central journal article supplement (PMC4408095; doi:10.1371/journal.pone.0123569), 2015-04-23
Supplement: pone.0123569.s002.pdf [file pone.0123569.s002.pdf]

## S2\_ File

### Comparative study of structural variation tools

Comparative study between structural variation detection tools such as Delly, Lumpy, GASVPro and xHMM. xHMM is not very effective for cancer data. Delly is effective for deleted greater than 1k bases; whereas, Lumpy is more sensitive for deletes less than 1k bases.

We compared the performance of four tools for structural variations of breast cancer exome data. These tools are xHMM [2], GASVPro [6], Delly [4], and Lumpy [5]. xHMM is designed to work on exome data, whereas all other tools were designed to work on whole genome. xHMM is designed for exome data and it uses Hidden Markov Model and Principle Component Analysis to train its core algorithm. GASVPro, Delly, and Lumpy on contrast is specifically designed for whole-genome data.

xHMM was trained on a data-set of 20 exome samples of healthy and cancer (hereditary pheochromocytoma) using publicly available data with id ERR031622, ERR031625, ERR031614, ERR031616, ERR031618, ERR031626, ERR031623, ERR031624, ERR031620, ERR031617, ERR031613, ERR031615, ERR031619, ERR031621, ERR031609, ERR031612, ERR031610, ERR031608, ERR031607, ERR031611 [1]. And was run on 5 HNC unpublished cancer data. 25 results of HNC cancer were randomly selected and manually verified using IGV [3] genome browser. 13 out of the 25 randomly selected SVs were correctly called by xHMM [2]. The variability and heterogeneity is so high in cancer cells that xHMM training is seldom complete. Unlike in other diseases, xHMM accuracy is low for cancer exome data. Therefore, xHMM was not considered for inclusion in XomAnnotate pipeline for cancer translational genomics.

An exome data is created from DNA by synthetically removing the intronic and intergenic regions through NGS chemistry and library preparation. To understand the effectiveness of structural variations tools Delly [4], Lumpy [5], and GASVPro [6] on exome data, all three tools were run on the same dataset, downloaded from NCBI's SRA archives. The sample chosen for the comparative study was from a patient affected with non-BRCA1/BRCA2 breast carcinoma (ERR166310), which is referred as BC5 in the main paper. The sample data was analyzed through iOMICS [www.iomics.in/iomics] Exome-seq pipeline. SV calls from different toolkits were randomly chosen and validated manually using IGV genome browser to identify which of the three methods were better at detecting SVs from whole exome data. Delly uses read pair distribution to identify structural variations and then uses split read analysis to refine the breakpoints [4]. GASVPro uses read pair distribution analysis to identify the

breakpoint, and refines the results by performing a read depth normalization [6]. Lumpy variation detection tool identifies the structural variations by using all three signal, read pair distribution, split read analysis and read depth normalization to arrive at accurate breakpoints for structural variations detected [4].

The comparisons were done separately for the different SVs called, namely deletions, duplications, inversions and translocations. Each call was verified for the breakpoints identified, the pair end distribution and depth of coverage at that given breakpoint, and manually checked to see if there was any concordance with the observations and the results from the different tools. It was seen that all three algorithms were able to identify SVs with high precision. The false discovery rate was however high, because the given dataset was whole exome data and not whole genome data for which the tools are optimized.

### 1. Deletions

Deletion is part of structural variation where a large portion of the genome is deleted. The length varies from few hundreds of bases to kilo bases. We examined which of the three algorithms (GASV, DELLY, LUMPY) can better identify deletions from whole exome data. All three algorithms were run on the same dataset and ten random calls from GASV, DELLY and LUMPY were visualized in IGV to validate the authenticity and specificity of the deletion called.

### Observations

#### GASV: Table: S2-1

| SV start – end           | IGV start-end           | Genes   | Comments                                                                                                                                         |
|--------------------------|-------------------------|---------|--------------------------------------------------------------------------------------------------------------------------------------------------|
| chrX: 55172705-55172910  | chrX:55172571-55185645  | FAM104B | Although GASV picks up a region smaller than that actually visualized, the call is accurate.                                                     |
| Chr11: 48367420-48367653 | Chr11:48367328-48373841 | OR4C45  | The depth of coverage is quite low, but the 5 deletions can be visualized, although again GASV picks up a smaller regions, it is still accurate. |
| Chr1: 7889929-7890208    | Chr1:7889763-7890309    | PER3    | In this case the deleted visualized and                                                                                                          |

|                           |                          |         |                                                                                                                                                                                                         |
|---------------------------|--------------------------|---------|---------------------------------------------------------------------------------------------------------------------------------------------------------------------------------------------------------|
|                           |                          |         | called GASV is of the same length and can be a true call.                                                                                                                                               |
| Chr8: 6587773-6587950     | Chr8: 6587709-6588404    | AGPAT5  | The call is in an intronic regions, but all reads visualized show the delete, the delete is visualized to extend into exonic region of the gene(exon3)                                                  |
| chrX: 55172665-55172822   | chrX:55172571-55185645   | FAM104B | GASV identifies a deletion in exon 3 of FAM104B, which can be visualized but the length called by GASV is smaller. This an overlapping region with the first call, yet is identified as a separate call |
| Chr5: 23527557-23527829   | Chr5:23527209-23527959   | PRDM9   | GASV is able to identify the delete accurately, but again is unable to get the breakpoints correctly(exon11)                                                                                            |
| Chr17: 45232038-45232382  | Chr17:45221258-45232111  | CDC27   | GASV identifies the wrong breakpoints in this case, although there is a delete in the region, but the breakpoint I identified by GASV is completely wrong.                                              |
| Chr19: 6387532-6387694    | Chr19:6387390-6388353    | GTF2F1  | GASV identifies a deletion in a low coverage region, although again the region visualized is larger than the variant called.(exon5)                                                                     |
| Chr17: 45216190-45216418  | Chr17:45216103-45219385  | CDC27   | GASV identifies a deletion in a low coverage region, although again the region visualized is larger than the variant called                                                                             |
| Chr2: 179315078-179315260 | Chr2:179314967-179315895 | PRKRA   | GASV identifies a deletion in a low coverage region, although again the region visualized is larger than the variant called.(exon2)                                                                     |

**Delly: Table: S2-2**

| SV start-end                 | IGV start-end                | Genes             | Comments                                                                                                        |
|------------------------------|------------------------------|-------------------|-----------------------------------------------------------------------------------------------------------------|
| chr4:110,448,513-110,448,800 |                              | SEC24B            | There no deletes that are visualized by IGV in the region called by Delly.                                      |
| chr9:138,054,602-138,054,743 |                              | Intergenic        | Delly calls a delete in an intragenic region with less than ten read alignments                                 |
| chr17:1,412,325-1,412,446    |                              | INPP5K (intronic) | Delly calls a delete in an intronic region. No deletes can be visualized in this region.                        |
| chr8:144,248,682-144,248,811 |                              | Intergenic        | Delly calls a delete in an intragenic region with less than ten read alignments                                 |
| chr5:140,208,907-140,238,931 | chr5:140,208,907-140,238,931 | PCDHA6            | Delly identifies a delete in this region which can be confirmed from IGV. The breakpoints are exact.(30000 len) |
| chr2:88,074,248-88,074,535   |                              | RGPD1             | One delete in this region can be visualized, as in the case of GASV breakpoints called are smaller              |
| chr11:47,660,374-47,663,942  | Chr11:47,660,258-47,664,002  | MTCH2             | The delete called by Delly can be visualized in IGV and the breakpoints are called correctly (3568 len)         |
| chr11:1,093,090-1,093,289    | Chr11:1,092,965-             | MUC2              | Delly calls a delete in a low                                                                                   |

|                              |                              |       |                                                                                                                  |
|------------------------------|------------------------------|-------|------------------------------------------------------------------------------------------------------------------|
|                              | 1,093,437                    |       | coverage region, which can be visualized in IGV. The breakpoints are accurate.                                   |
| chr2:179,306,430-179,307,992 | Chr2:179,306,337-179,308,075 | PRKRA | Delly identifies a delete in this region which can be confirmed from IGV. The breakpoints are exact (1000 len).  |
| chr17:45,221,343-45,232,038  | chr17:45,221,343-45,232,038  | CDC27 | Delly identifies a delete in this region which can be confirmed from IGV. The breakpoints are exact (10000 len). |

**Lumpy: Table: S2-3**

| SV start-end                 | IGV start-end | Genes     | Comments                                                                       |
|------------------------------|---------------|-----------|--------------------------------------------------------------------------------|
| chr6:26,017,514-26,017,688   |               | HIST1H1A  | No deletes can be visualized from this region identified as a delete by Lumpy* |
| chr15:72,313,076-72,313,304  |               | MY09A     | No deletes can be visualized from this region identified as a delete by Lumpy* |
| chr11:71,614,375-71,614,530  |               | NR_029192 | No deletes can be visualized from this region identified as a delete by Lumpy* |
| chr1:113,231,904-113,232,155 |               | MOV10     | No deletes can be visualized from this region identified as a delete by Lumpy* |
| chr8:124,238,548-124,238,737 |               | C8orf76   | No deletes can be visualized from this region identified as a                  |

|                              |  |            |                                                                                |
|------------------------------|--|------------|--------------------------------------------------------------------------------|
|                              |  |            | delete by Lumpy*                                                               |
| chrX:103,411,796-103,411,997 |  | FAM199X    | No deletes can be visualized from this region identified as a delete by Lumpy* |
| chr2:11,919,637-11,919,795   |  | LPN1       | No deletes can be visualized from this region identified as a delete by Lumpy* |
| chr7:36,662,845-36,662,960   |  | AOAH       | No deletes can be visualized from this region identified as a delete by Lumpy* |
| chr9:86,834,003-86,834,306   |  | Intergenic | No deletes can be visualized from this region identified as a delete by Lumpy* |
| chr2:9,994,314-9,994,514     |  | TAF1B      | No deletes can be visualized from this region identified as a delete by Lumpy* |

\*In all cases called by Lumpy except the Intergenic one, the insert was reads was greater than the median insert size of 246.

## 2. Inversions

Inversion is a type of structural variation of the genome where a segment of DNA that is reversed in orientation with respect to the rest of the chromosome. Pericentric inversions include the centromere, whereas paracentric inversions do not. To identify which of the three algorithms (GASV, DELLY, LUMPY) can better identify inversions from whole exome data, all three algorithms were run on the same dataset and random calls from GASV, DELLY and LUMPY were visualized in IGV to validate the authenticity and specificity of the inversion called.

**GASV: Table: S2-4**

| SV start-end                 | IGV start-end                | Genes             | Comments                                                              |
|------------------------------|------------------------------|-------------------|-----------------------------------------------------------------------|
| chr5:115,346,859-115,347,309 | Chr5:115,346,514-115,351,067 | AQPEP<br>(intron) | GASV identifies inversions in the given region, which is seen in IGV. |

|                             |                             |            |                                                                                                                                 |
|-----------------------------|-----------------------------|------------|---------------------------------------------------------------------------------------------------------------------------------|
|                             |                             |            | The breakpoints indicated by GASV are smaller than the region visualized                                                        |
| chr12:39,859,907-39,860,204 | Chr12:39,859,892-39,860,300 | Intergenic | GASV identifies an inversion in an Intergenic region, which can be visualized in IGV. The breakpoint found are highly accurate. |

**Delly: Table: S2-5**

| SV start-end               | IGV start-end              | Gene                 | Comments                                                                                                                     |
|----------------------------|----------------------------|----------------------|------------------------------------------------------------------------------------------------------------------------------|
| chr9:68,421,817-68,429,199 | Chr9:68,421,725-68,429,196 | Intergenic-LOC642236 | Delly identifies inversion in the given region, which can be visualized using IGV and the breakpoints are extremely accurate |
| chr2:33141320-33141543     | Chr233,141,319-33,141,623  | LINC00486            | Delly identifies an inversion which can be visualized using IGV, the breakpoints are extremely accurate                      |

**Lumpy: Table: S2-6**

| SV start-end                 | IGV start-end                | Genes  | Comments                                                                                                                                         |
|------------------------------|------------------------------|--------|--------------------------------------------------------------------------------------------------------------------------------------------------|
| chr5:115,346,580-115,346,891 | Chr5:115,346,514-115,351,067 | AQPEP  | Lumpy identifies inversions in the given region, which is seen in IGV. The breakpoints indicated by Lumpy are smaller than the region visualized |
| chr12:71,533,260-71,533,458  | Chr12:71,533,197-71,533,651  | TSPAN8 | Lumpy identifies inversions in the given region, which is seen in IGV. The breakpoints indicated by Lumpy are smaller than the region visualized |

### 3. Translocations

Translocation is a type of structural variation where part of a genome breaks and moves to another location within the genome. To identify which of the three algorithms (GASV, DELLY, LUMPY) can

better identify translocation from whole exome data, all three algorithms were run on the same dataset and random calls from GASV, DELLY and LUMPY were visualized in IGV to validate the authenticity and specificity of the translocation called.

## Observations

**GASV: Table: S2-7**

| SV start-end                        | IGV start-end                   | Genes  | Comments                                                       |
|-------------------------------------|---------------------------------|--------|----------------------------------------------------------------|
| Chr1: 91852620-chr21:<br>15457354   | Chr1:91852900-chr21:15457392    | HFM1   | GASV identifies a translocation which can be visualized in IGV |
| chr5:134264138 – chr17:<br>42075120 |                                 | PCB02  | The region identified by GASV could not be visualized          |
| chr1:109650566 -<br>chr22:30163282  | chr1:109650566 - chr22:30163282 | UQCR10 | GASV identifies a translocation which can be visualized in IGV |
| chr1:91853070 - chr23<br>108297795  | chr1:91853070 - chr23 108297795 | HFM1   | GASV identifies a translocation which can be visualized in IGV |

**Delly: Table: S2-8**

| SV start-end                        | IGV start-end                  | Genes | Comments                                                        |
|-------------------------------------|--------------------------------|-------|-----------------------------------------------------------------|
| chrX: 55172734 – chr18:<br>65960339 |                                |       | The region identified by Delly could not be visualized          |
| Chr6:6226281 – chr1:<br>93167673    |                                |       | The region identified by Delly could not be visualized          |
| Chr5:90129535 – chr2:<br>68368829   | Chr5:90129461 – chr2:68368751  | GPR98 | Delly identifies a translocation which can be visualized in IGV |
| Chr11:97507818 – chr4:              | Chr11:97507849 – chr4:66439408 | EPHA5 | Delly identifies a                                              |



|          |  |  |                                              |
|----------|--|--|----------------------------------------------|
| 66439504 |  |  | translocation which can be visualized in IGV |
|----------|--|--|----------------------------------------------|

**Lumpy: Table: S2-9**

| SV start-end                   | IGV start-end                    | Genes   | Comments                                                        |
|--------------------------------|----------------------------------|---------|-----------------------------------------------------------------|
| chr16:60603640 - chrX:55185586 | Chr16: 60603643 – chrX: 55185604 | FAM104B | Lumpy identifies a translocation which can be visualized in IGV |
| chr8:46948143 - chr17:45258974 | Chr8:46948135 – chr17:45266511   | CDC27   | Lumpy identifies a translocation which can be visualized in IGV |
| chr7:63572539 - chr12:41757470 | Chr7:63572765 – chr12:41757479   | PDZRN4  | Lumpy identifies a translocation which can be visualized in IGV |
| chr1:91853025 - chrX:108297658 | Chr1:91853055 – chrX:108297766   | HFM1    | Lumpy identifies a translocation which can be visualized in IGV |

**4. Duplications**

Duplication is a type of structural variation, where part of the genome is duplicated and inserted within the genome. Like the other validation tests, we used the same dataset for all three tools.

**Observations**

**GASVPro is unable to detect any duplications**

**Delly: Table: S2-10**

| SV start-end                 | IGV start-end                | Genes      | Comments                                                                     |
|------------------------------|------------------------------|------------|------------------------------------------------------------------------------|
| chr2:133,026,690-133,030,657 | chr2:133,026,690-133,030,657 | Intergenic | Delly calls duplication in intergenic region which can be visualized by IGV. |
| chr17:33,478,246-33,478,353  | chr17:33,478,246-33,478,320  | UNC45B     | Delly calls duplication in                                                   |

|  |  |  |                                                 |
|--|--|--|-------------------------------------------------|
|  |  |  | intronic region which can be visualized by IGV. |
|--|--|--|-------------------------------------------------|

**Lumpy: Table: S2-11**

| SV start-end                     | IGV start-end                     | Genes      | Comments                                                                                                                                            |
|----------------------------------|-----------------------------------|------------|-----------------------------------------------------------------------------------------------------------------------------------------------------|
| chr2:133,026,521-<br>133,026,830 | Chr2:133,026,686 -<br>133,030,633 | Intergenic | Lumpy finds duplication in the flanking region of the duplicate which can be visualized using IGV                                                   |
| chr17:33,478,074-<br>33,478,322  | Chr17:33,478,246-<br>33,478,320   | UNC45B     | Lumpy calls a duplication in the intronic region which can be visualized by IGV, the breakpoints called are larger than the duplications visualized |

### Conclusions

For deletions, it was found that, for cases where the deletes were of length <1kb, GASVPro and Lumpy outperformed Delly in identifying true breakpoints as it can be seen from tables (S2-1, S2-2, S2-3). However, when it comes to deletes of length >1kb, Delly is much more accurate with respect to the other two. Of the 30 deletions considered (10 randomly selected from each tool), it was found that GASVPro was able to accurately call 7 deletes of length <1kb, although it did detect 2 deletes of length >1kb, the breakpoints were not correct. Delly was able to identify 4 deletes of length <1kb although these are in the intronic / intergenic regions, 4 deletes >1kb where the breakpoints called extremely accurate. Lumpy identifies 9 deletes <1kb.

For Inversions it was found that, Delly was able to call inversion with greater confidence and accuracy as compared to the other two methods, as seen from table (S2-4, S2-5, and S2-6). Of the 6 inversions considered (2 for each tool) it was found that GASVPro was able to identify both inversion correctly however the breakpoints for one of the calls was not accurate. Delly was able to identify both the inversions with high accuracy with respect to breakpoints. Lumpy, though it was able to identify the region of inversion, the breakpoints were inaccurate.

For translocation, 4 translocation were randomly considered for verification, table(S2-7, S2-8, S2-9) and it was found that Lumpy showed greater accuracy of the three methods, Lumpy was able to correctly call all four translocations where are GASVPro had only 75% success rate and Delly had only a 50% percent success rate.

With respect to duplications however, none of the three methods were able to identify the SV with high confidence. GASVPro does not detect duplications as of yet. Of the two duplications randomly chosen for verification for the other two methods, table (S2-10, S2-11), Delly was able detect both with high precision w.r.t breakpoints, but the regions identified were intronic in nature, Lumpy was able to identify the region, but the breakpoints identified were not accurate.

## References

1. Comino-Méndez I, Gracia-Aznárez FJ, Schiavi F, Landa I, Leandro-García LJ, Letón R, Honrado E, Ramos-Medina R, Caronia D, Pita G, Gómez-Graña A, de Cubas AA, Inglada-Pérez L, Maliszewska A, Taschin E, Bobisse S, Pica G, Loli P, Hernández-Lavado R, Díaz JA, Gómez-Morales M, González-Neira A, Roncador G, Rodríguez-Antona C, Benítez J, Mannelli M, Opocher G, Robledo M, Cascón A. Exome sequencing identifies MAX mutations as a cause of hereditary pheochromocytoma. *Nature genetics*, 43, 663-667, 2011.
2. Fromer M, Moran JL, Chambert K, Banks E, Bergen SE, Ruderfer DM, Handsaker RE, McCarroll SA, O'Donovan MC, Owen MJ, Kirov G, Sullivan PF, Hultman CM, Sklar P, Purcell SM. Discovery and Statistical Genotyping of Copy-Number Variation from Whole-Exome Sequencing Depth. *The American Journal of Human Genetics*, 91, 597-607, 2012.
3. James T Robison, Helga Thorvaldsdottir, Wendy Winckler, Mitchell Guttman, Eric S Lander, Gad Getz and Jill P Mesirov. Integrative genomics viewer. *Nature Biotechnology*. 29, 24-26. 2011.
4. Rausch T, Zichner T, Schlattl A, Stütz AM, Benes V, Korbel JO, Delly: structural variant discovery by integrated paired-end and split-read analysis, *Bioinformatics*, Vol 28, i333-i339, 2012.
5. Ryan M. Layer, Ira M. Hall, Aaron R Quinlan. Lumpy: A probabilistic framework for structural variation discovery. *ArXiv: 1210.2342v2* .2012.
6. Shihua Zhang, Xuemei Ning, Xiang-Sun Zhang, Identification of functional modules in a PPI network by clique percolation clustering, *Computational Biology and Chemistry* 30 (2006) 445–451.
