# Supplementary material for: XomAnnotate: Analysis of Heterogeneous and Complex Exome- A Step towards Translational Medicine
Source: PubMed Central journal article supplement (PMC4408095; doi:10.1371/journal.pone.0123569), 2015-04-23
Supplement: pone.0123569.s004.pdf [file pone.0123569.s004.pdf]

## S4\_File

### Pathway-gene bipartite graph analysis

Bipartite graph analysis results of 11 non-BRCA1/BRCA2 breast cancer patients (BC1 to BC11) are represented here. The betweenness and degree centrality pathways and genes are also shown. For each patient, there are four graphs:

- (a) Bipartite graph plot of vertices and their connections where red dots are the pathways and green dots are genes.
- (b) Bipartite graph in layered format (two layers) where the upper layer represents pathways and the lower layer representing genes along with their connections and interactions.
- (c) Histogram of pathway degree distribution.
- (d) Histogram of gene degree distribution.

**ERR166303 (BC1)**

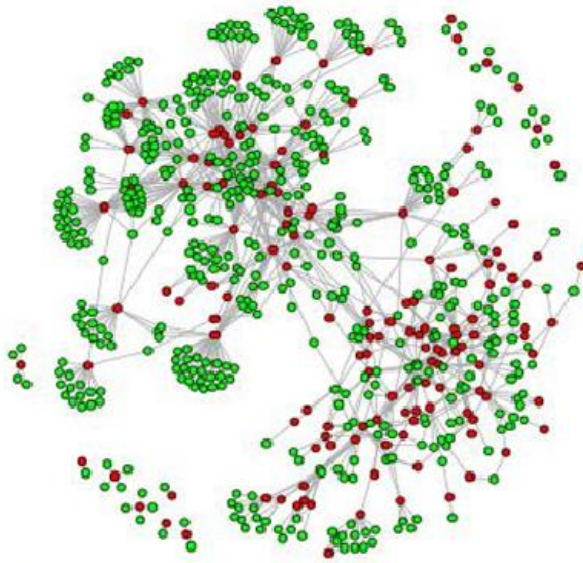

**(a) Bipartite Pathway-Gene Interaction of BC1**

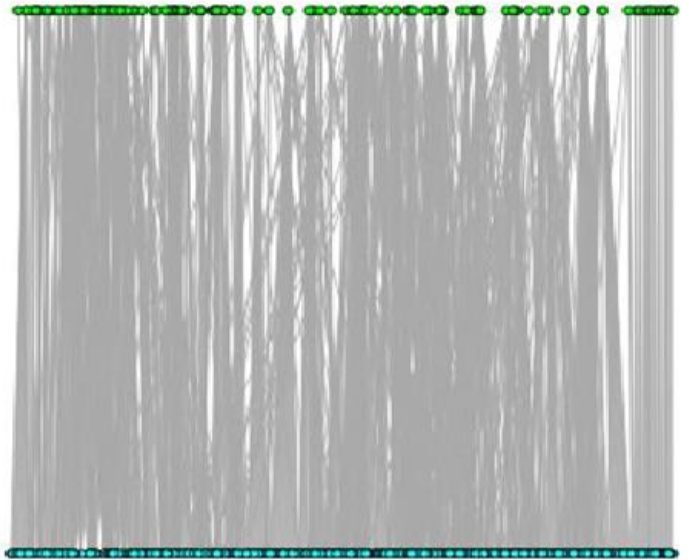

**(b) Pathway-Gene Bipartite Graph**

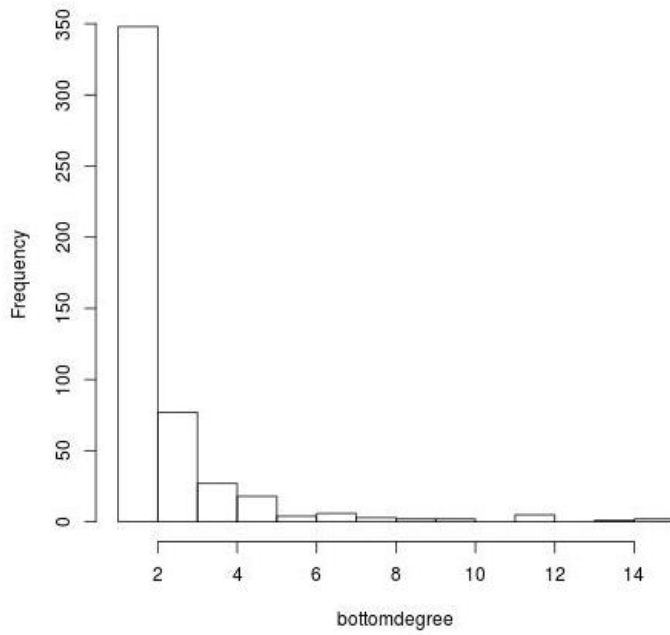

**(c) Bigraph Gene Degree Distribution for BC1**

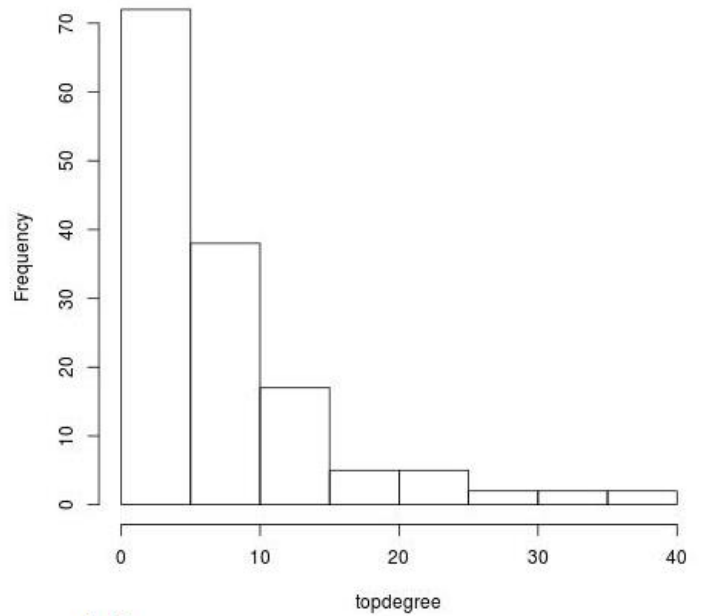

**(d) Bigraph Pathway Degree Distribution for BC1**

**ERR166304 (BC2)**

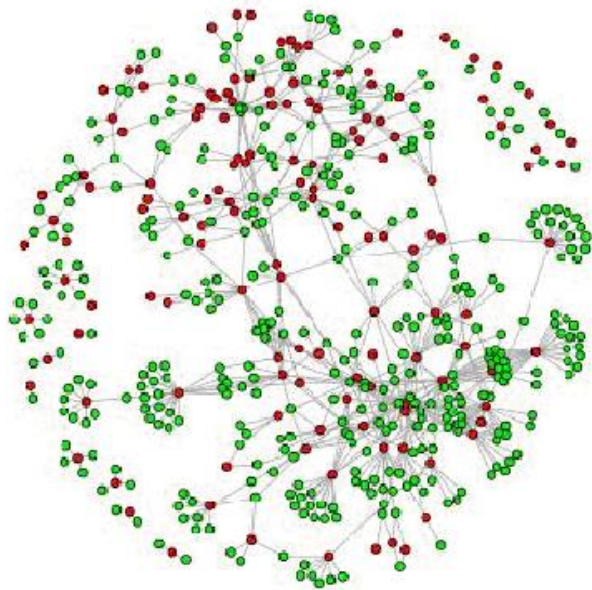

**(a) Bipartite Pathway-Gene Interaction of BC2**

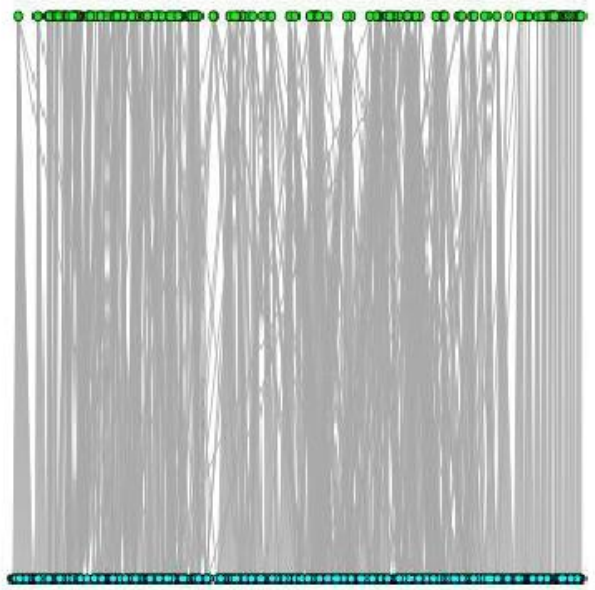

**(b) Pathway-Gene Bipartite Graph**

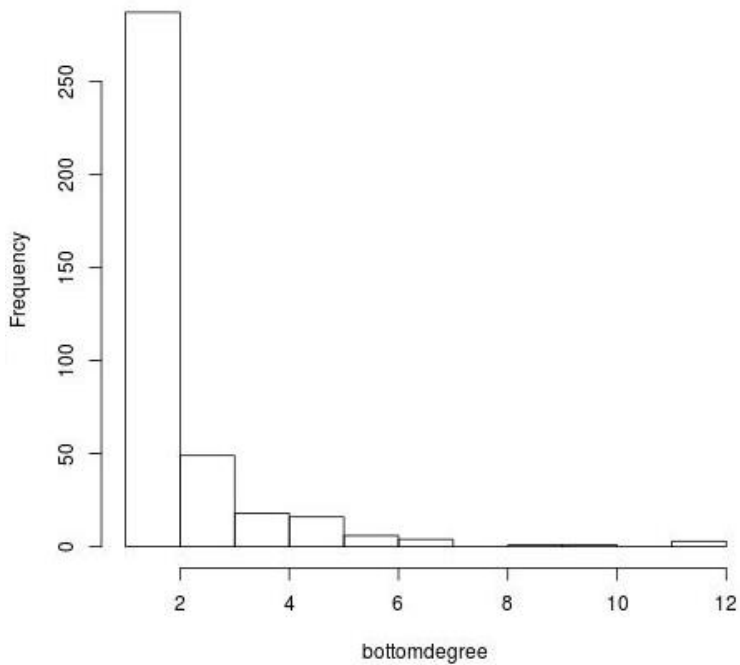

**(c) Bigraph Gene Degree Distribution for BC2**

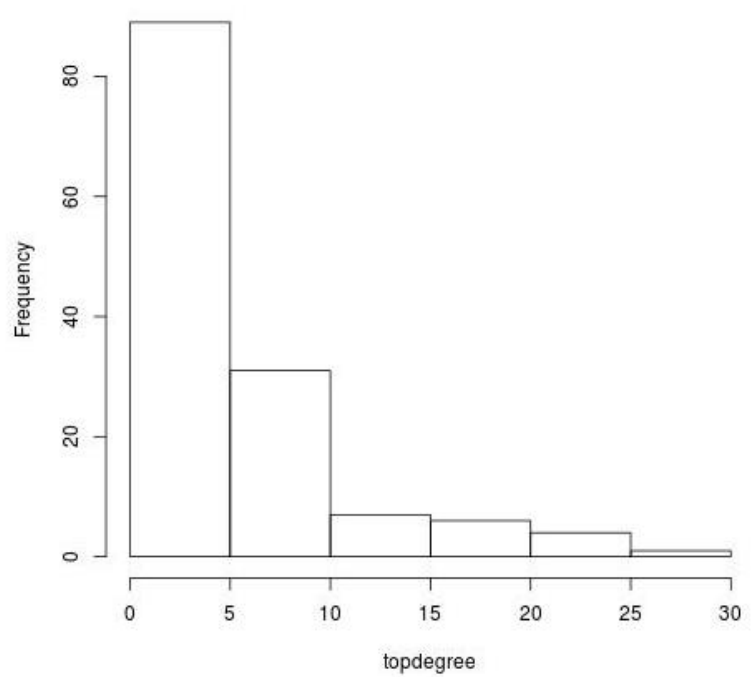

**(d) Bigraph Pathway Degree Distribution for BC2**

**ERR166307 (BC3)**

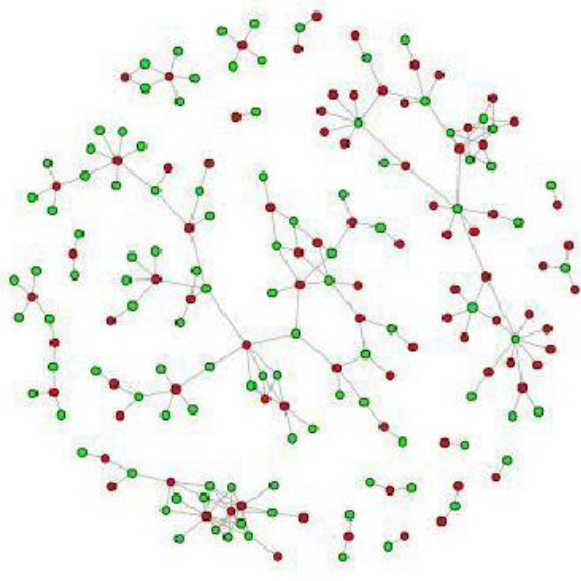

**(a) Bipartite Pathway-Gene Interaction of BC3**

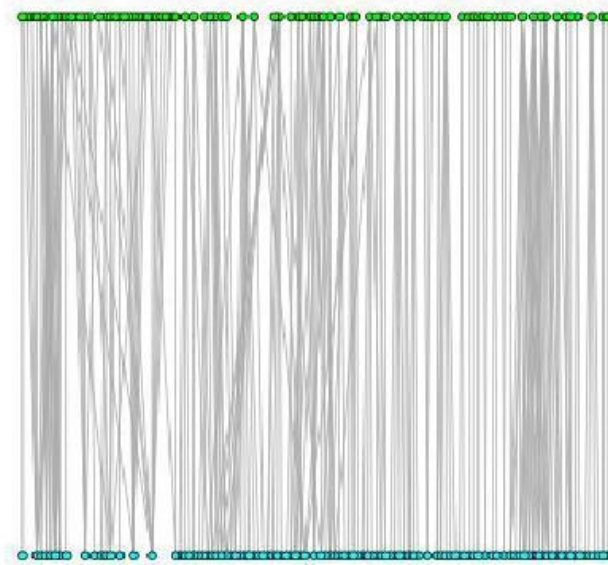

**(b) Pathway-Gene Bipartite Graph**

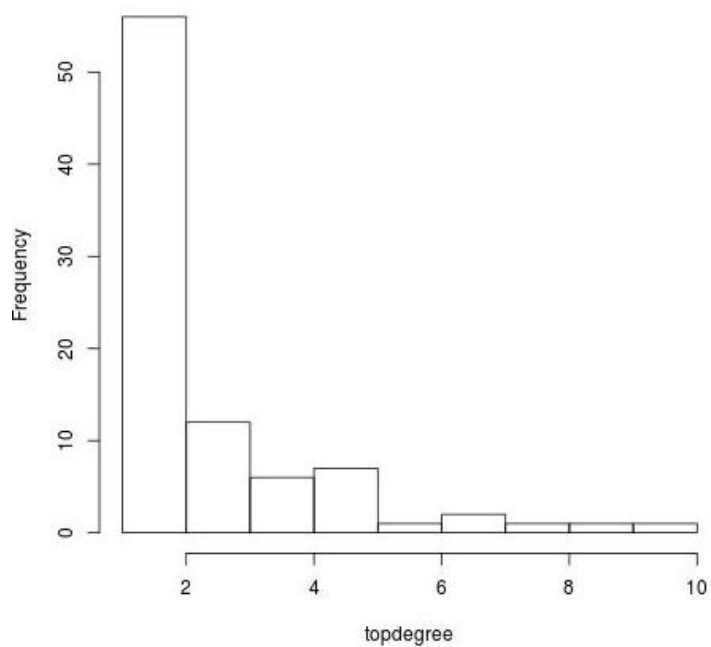

**(c) Bigraph Pathway Degree Distribution for BC3**

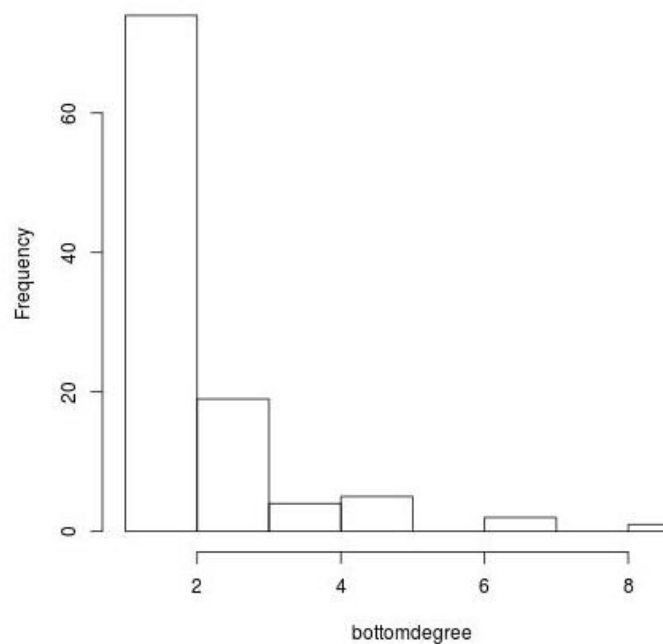

**(d) Bigraph Gene Degree Distribution for BC3**

**ERR166308 (BC4)**

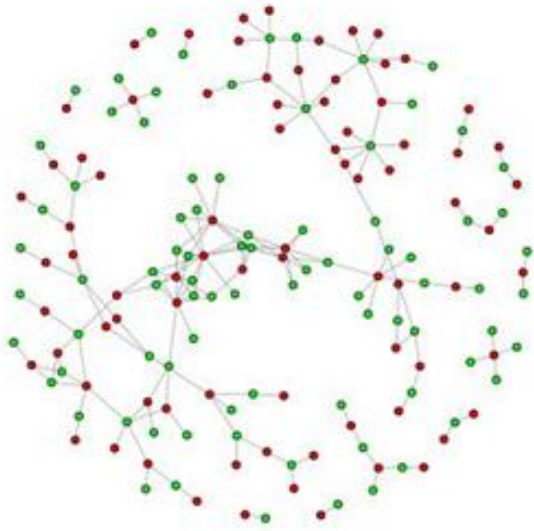

(a) Bipartite Pathway-Gene Interaction of BC4

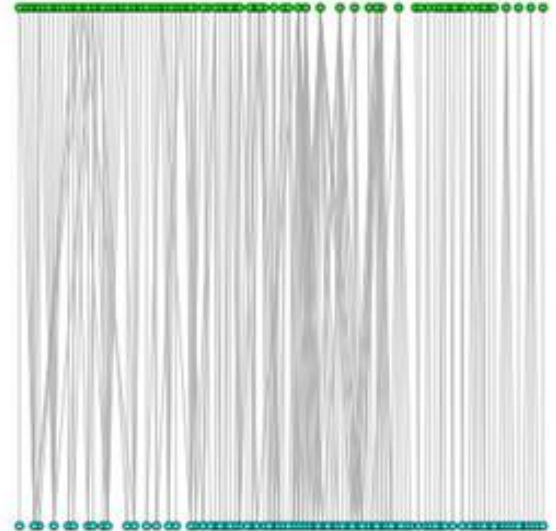

(a) Pathway-Gene Bipartite graph of BC4

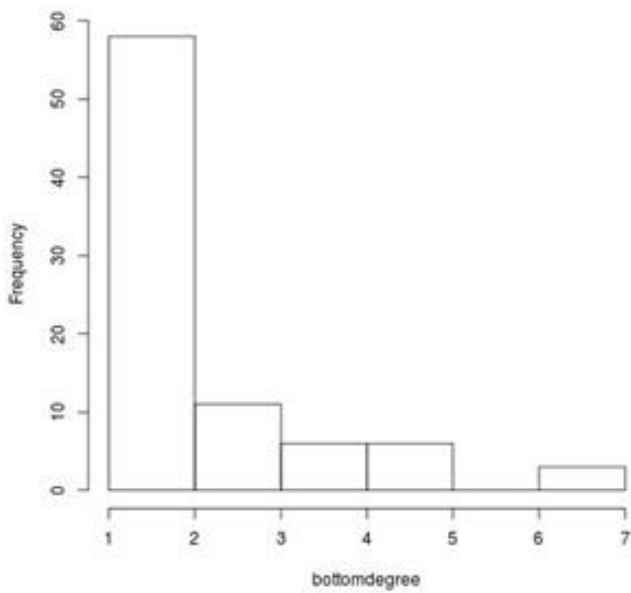

(a) Bigraph Pathway Degree Distribution of BC4

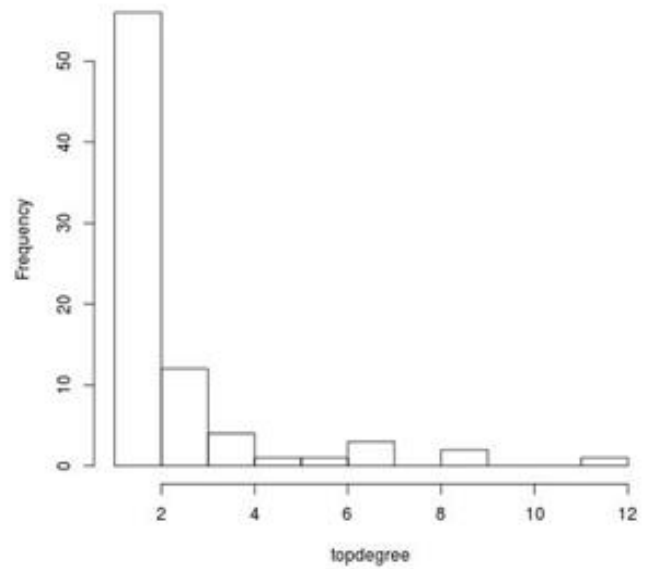

(a) Bigraph Gene Degree Distribution of BC4

**ERR166310 (BC5)**

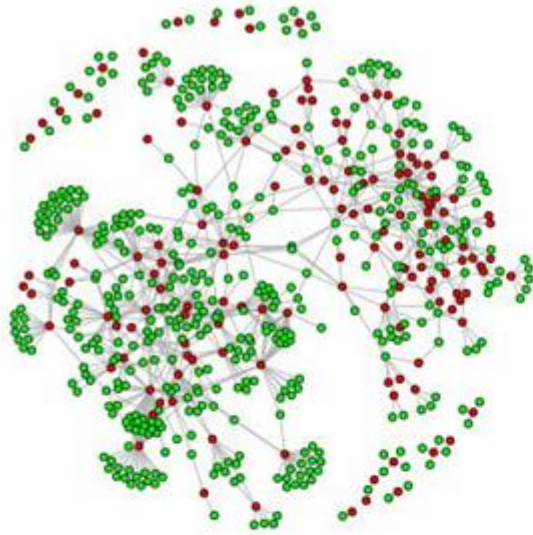

(a) Bipartite Pathway-Gene Interaction of BC5

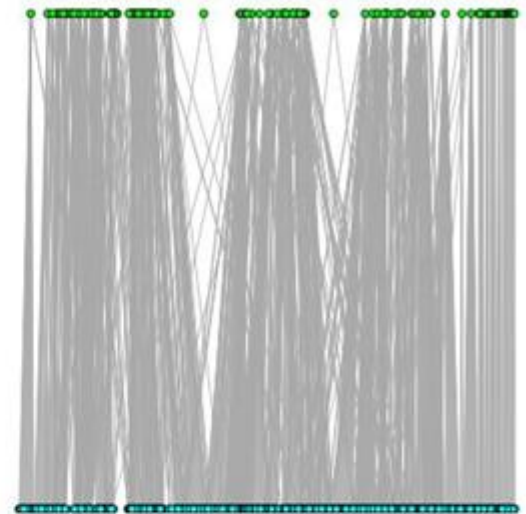

(a) Pathway-Gene Bipartite graph of BC5

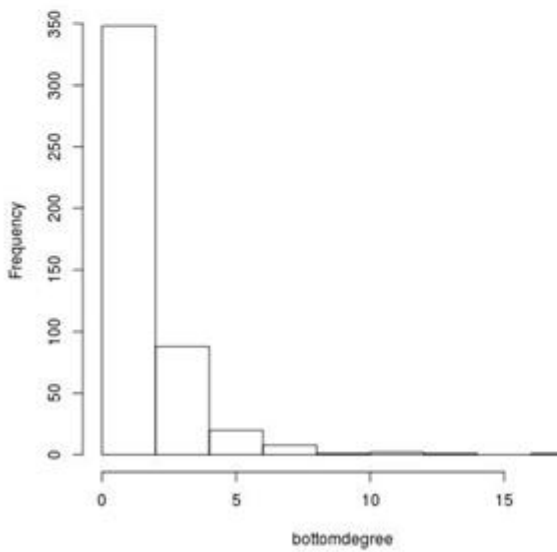

(a) Bigraph Pathway Degree Distribution of BC5

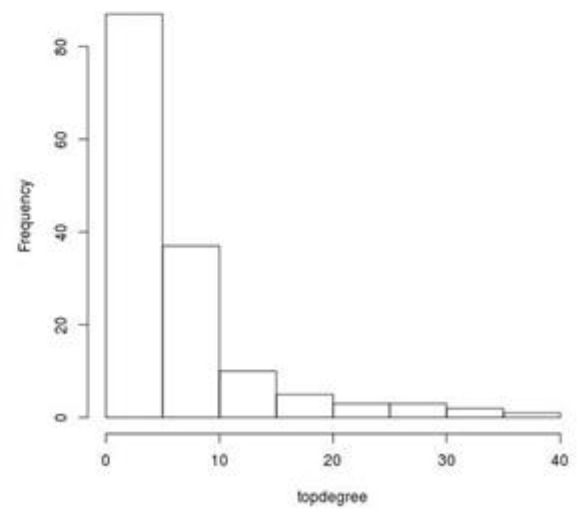

(a) Bigraph Gene Degree Distribution of BC5

**ERR166312 (BC6)**

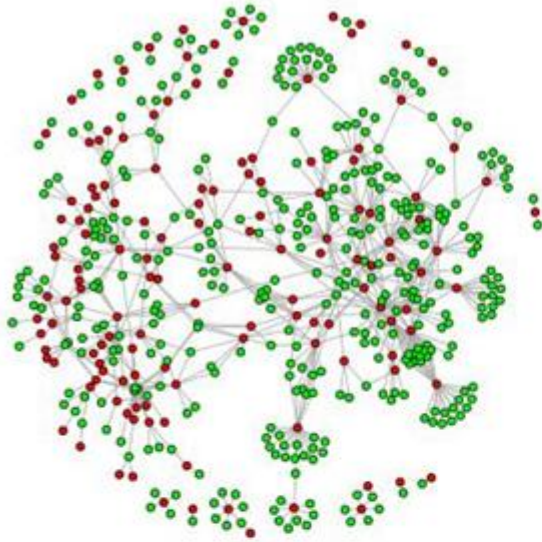

(a) Bipartite Pathway-Gene Interaction of BC6

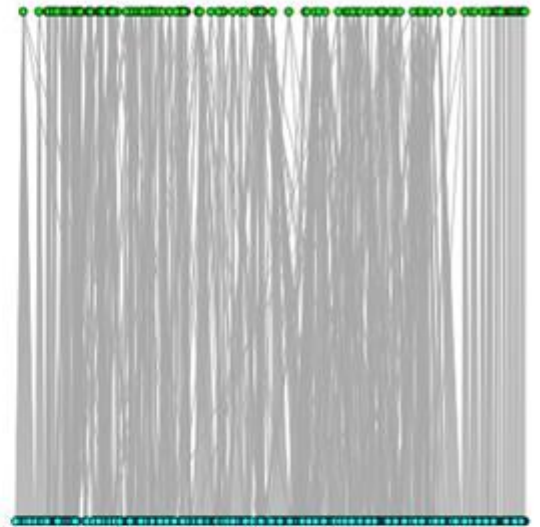

(a) Pathway-Gene Bipartite graph of BC6

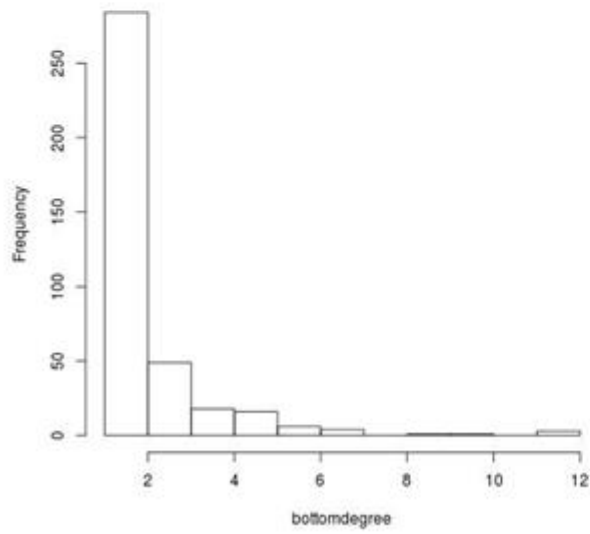

(a) Bigraph Pathway Degree Distribution of BC6

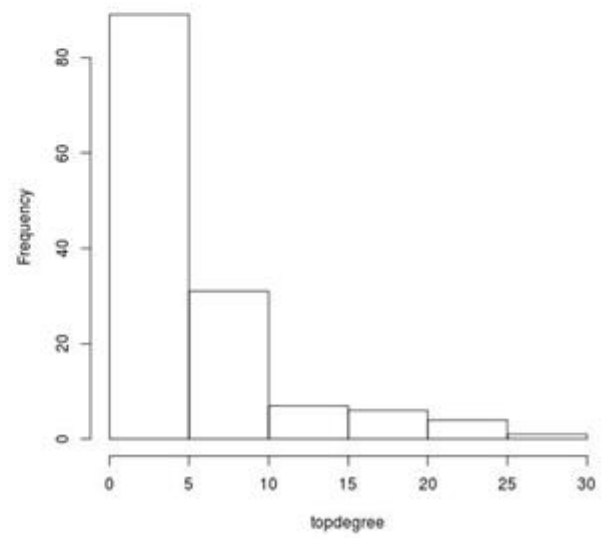

(a) Bigraph Gene Degree Distribution of BC6

**ERR166315 (BC7)**

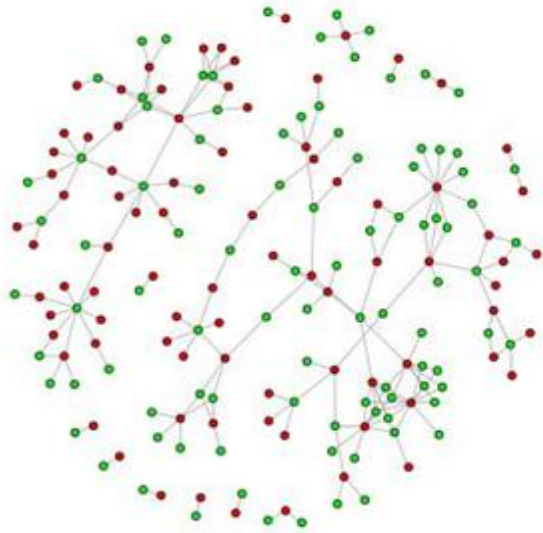

(a) Bipartite Pathway-Gene Interaction of BC7

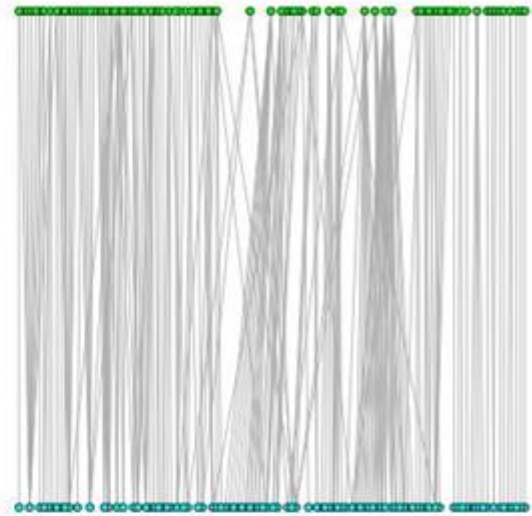

(a) Pathway-Gene Bipartite graph of BC7

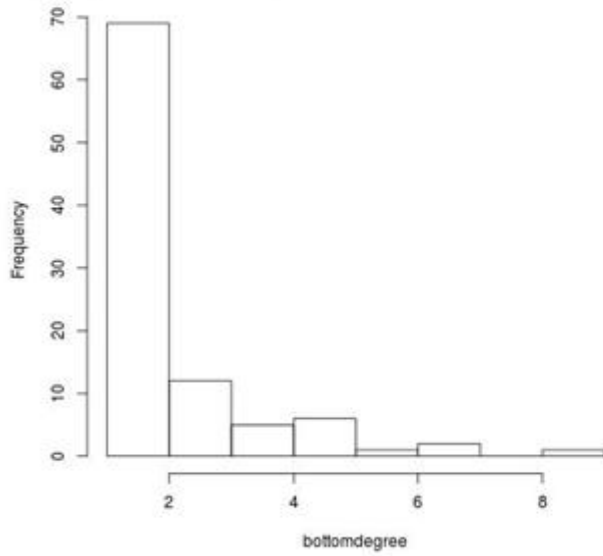

(a) Bigraph Pathway Degree Distribution of BC7

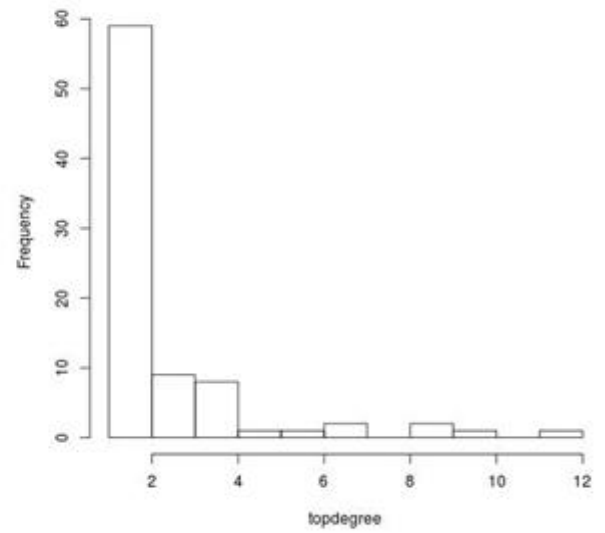

(a) Bigraph Gene Degree Distribution of BC7



**ERR166330 (BC8)**

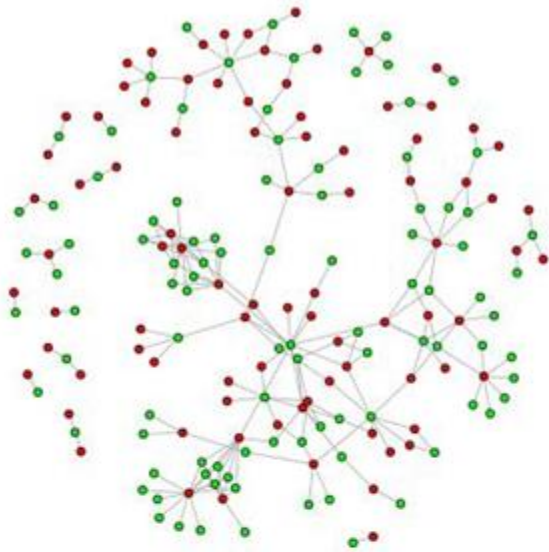

(a) Bipartite Pathway-Gene Interaction of BC8

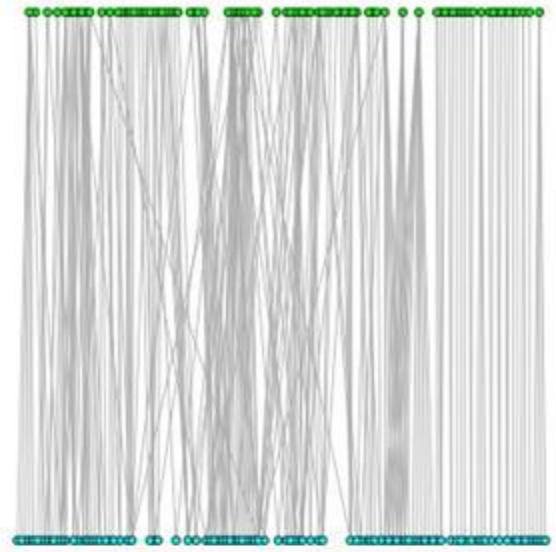

(a) Pathway-Gene Bipartite graph of BC8

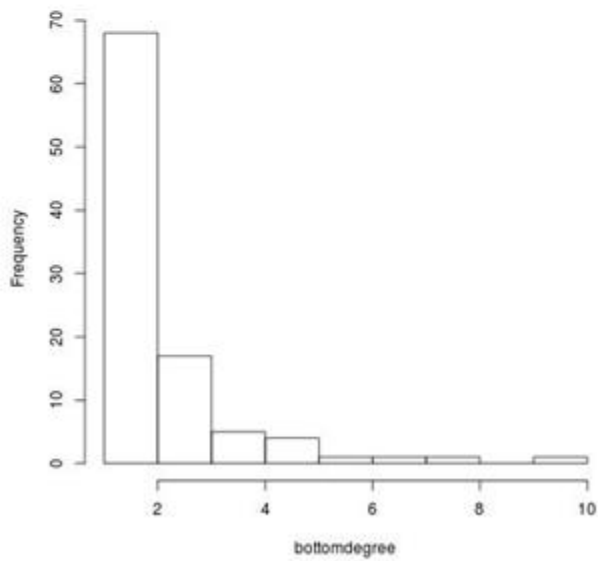

(a) Bigraph Pathway Degree Distribution of BC8

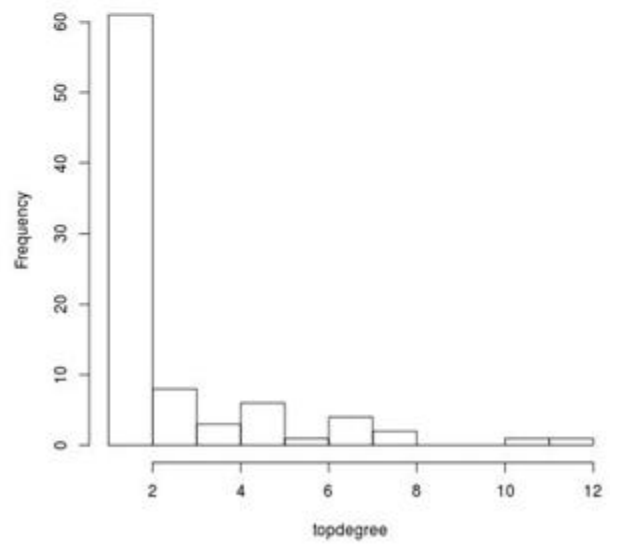

(a) Bigraph Gene Degree Distribution of BC8

**ERR166333 (BC9)**

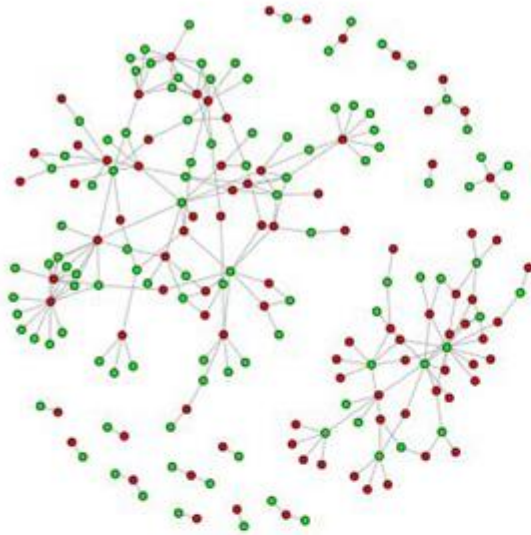

(a) Bipartite Pathway-Gene Interaction of BC9

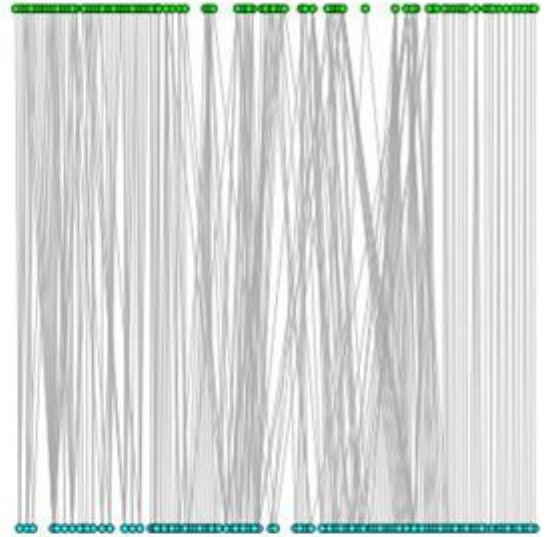

(a) Pathway-Gene Bipartite graph of BC9

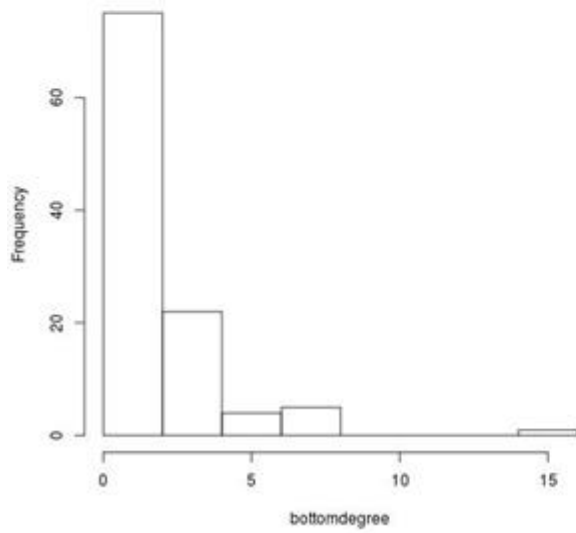

(a) Bigraph Pathway Degree Distribution of BC9

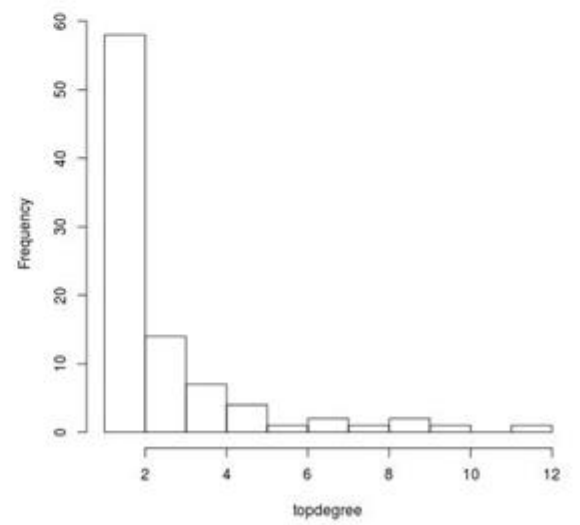

(a) Bigraph Gene Degree Distribution of BC9

**ERR166335 (BC10)**

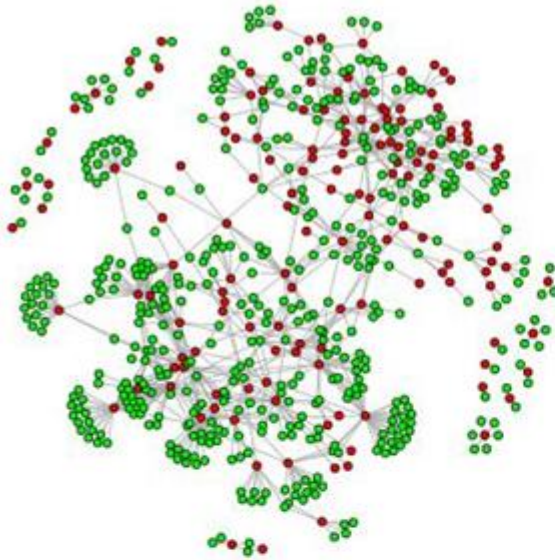

(a) Bipartite Pathway-Gene Interaction of BC10

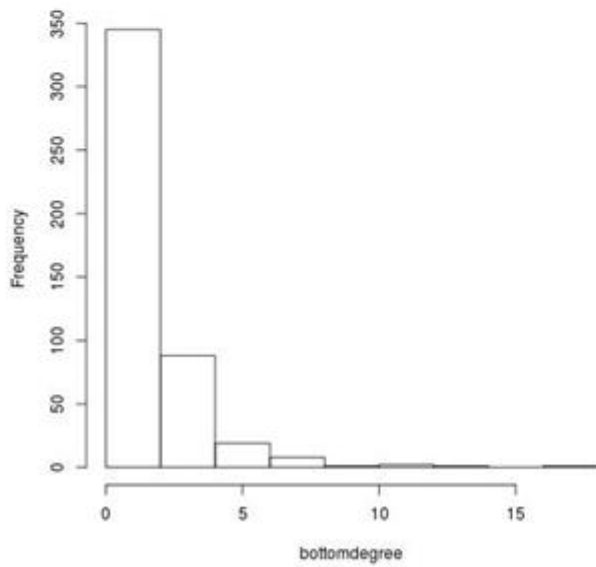

(a) Bigraph Pathway Degree Distribution of BC10

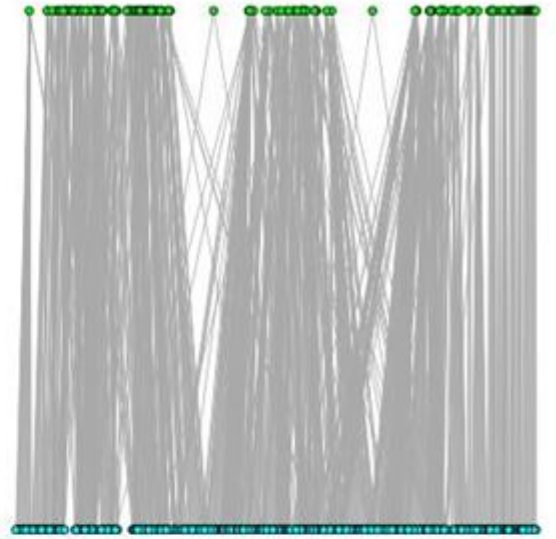

(a) Pathway-Gene Bipartite graph of BC10

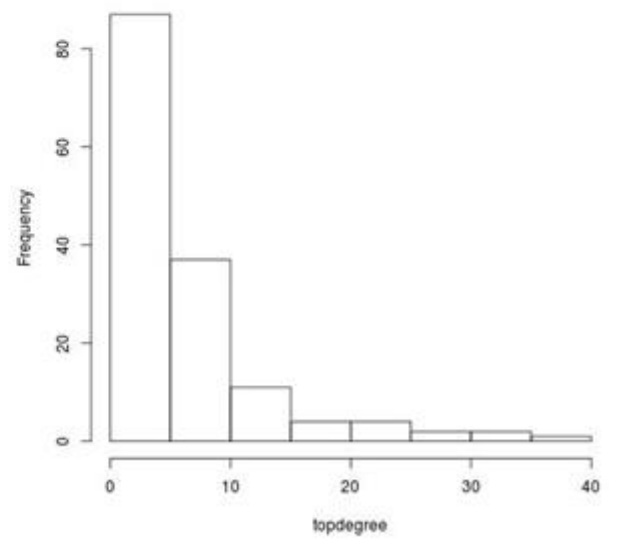

(a) Bigraph Gene Degree Distribution of BC10

**ERR166336 (BC11)**

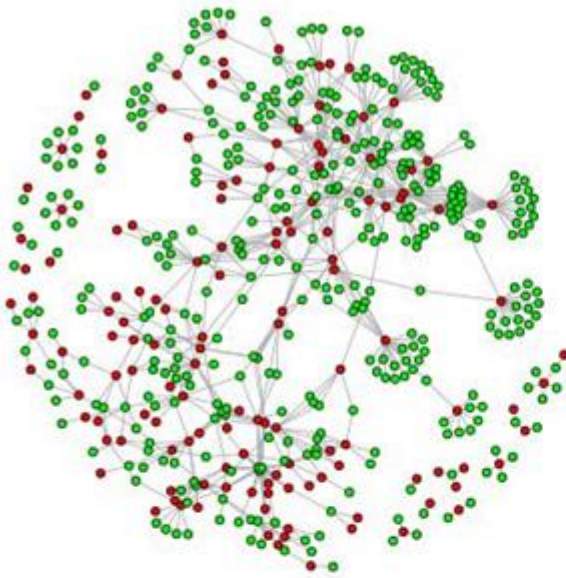

(a) Bipartite Pathway-Gene Interaction of BC11

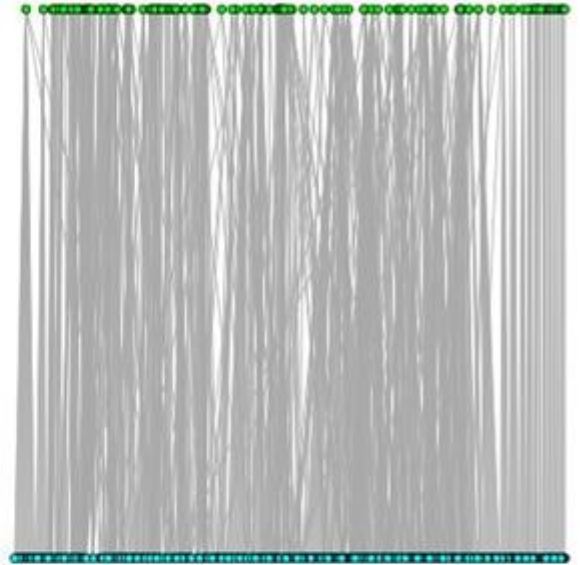

(a) Pathway-Gene Bipartite graph of BC11

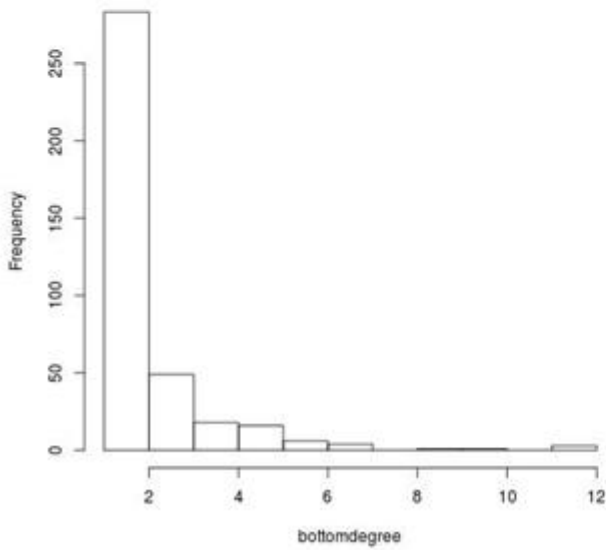

(a) Bigraph Pathway Degree Distribution of BC11

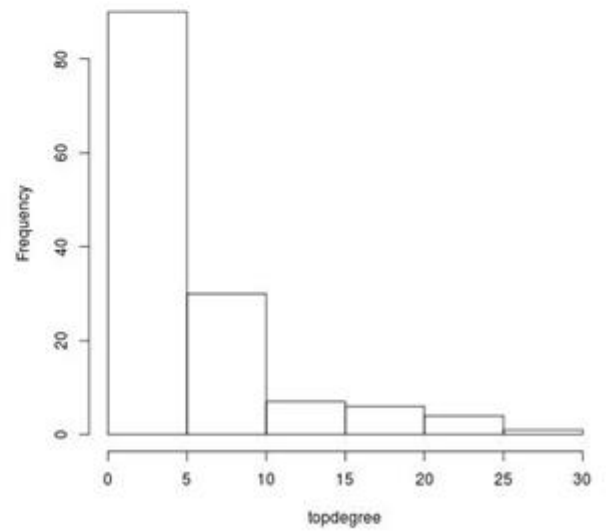

(a) Bigraph Gene Degree Distribution of BC11
