# Supplementary material for: XomAnnotate: Analysis of Heterogeneous and Complex Exome- A Step towards Translational Medicine
Source: PubMed Central journal article supplement (PMC4408095; doi:10.1371/journal.pone.0123569), 2015-04-23
Supplement: pone.0123569.s006.pdf [file pone.0123569.s006.pdf]

## S1\_ Table

**Downloaded exome data statistics:** This table gives information of the raw read count and number of variations detected (unfiltered) by the various tools like GATK's Unified Genotyper, Freebayes, Delly, and Lumpy.

| Sample Name | SRA ID    | Number of reads in FASTQ format | Number of variants detected by GATK | Number of variants detected by Freebayes | Number of variants detected by Delly | Number of variants detected by Lumpy |
|-------------|-----------|---------------------------------|-------------------------------------|------------------------------------------|--------------------------------------|--------------------------------------|
| <b>BC1</b>  | ERR166303 | 31,781,555                      | 36,892                              | 131,866                                  | 2,150                                | 470,494                              |
| <b>BC2</b>  | ERR166304 | 34,046,710                      | 33,127                              | 127,676                                  | 2,247                                | 425,815                              |
| <b>BC3</b>  | ERR166307 | 31,566,246                      | 21,375                              | 127,694                                  | 2,217                                | 468,845                              |
| <b>BC4</b>  | ERR166308 | 27,984,553                      | 38,596                              | 111,507                                  | 1,627                                | 455,866                              |
| <b>BC5</b>  | ERR166310 | 35,051,501                      | 36,631                              | 129,648                                  | 1,313                                | 415,154                              |
| <b>BC6</b>  | ERR166312 | 34,418,993                      | 33,095                              | 96,048                                   | 1,153                                | 397,214                              |
| <b>BC7</b>  | ERR166315 | 31,335,982                      | 20,910                              | 120,255                                  | 1,939                                | 470,630                              |
| <b>BC8</b>  | ERR166330 | 33,061,003                      | 20,908                              | 105,784                                  | 1,228                                | 445,610                              |
| <b>BC9</b>  | ERR166333 | 34,407,232                      | 21,453                              | 104,431                                  | 1,133                                | 497,477                              |
| <b>BC10</b> | ERR166335 | 34,527,242                      | 36,695                              | 102,571                                  | 1,120                                | 473,175                              |
| <b>BC11</b> | ERR166336 | 33,929,079                      | 33,128                              | 102,584                                  | 1,161                                | 406,152                              |
| <b>H1</b>   | ERR031613 | 30,392,863                      | 20,804                              | 204,243                                  | 203,600                              | 582,408                              |
| <b>H2</b>   | ERR031614 | 30,784,396                      | 21,249                              | 210,846                                  | 207,890                              | 586,620                              |
| <b>H3</b>   | ERR031615 | 34,188,883                      | 21,843                              | 475,983                                  | 4,678                                | 476,041                              |
| <b>H4</b>   | ERR031616 | 35,569,006                      | 22,013                              | 114,123                                  | 4,953                                | 485,527                              |
| <b>H5</b>   | ERR031617 | 31,903,427                      | 20,996                              | 108,304                                  | 6,249                                | 507,784                              |
| <b>H6</b>   | ERR031618 | 31,011,913                      | 18,523                              | 110,102                                  | 5,437                                | 512,310                              |
| <b>H7</b>   | ERR031619 | 25,566,841                      | 19,464                              | 223,033                                  | 175,928                              | 505,912                              |
| <b>H8</b>   | ERR031620 | 25,899,833                      | 19,786                              | 231,020                                  | 174,656                              | 509,757                              |
| <b>H9</b>   | ERR031621 | 23,342,501                      | 16,795                              | 173,149                                  | 3,687                                | 676,347                              |
| <b>H10</b>  | ERR031622 | 29,612,812                      | 19,036                              | 285,228                                  | 4,070                                | 765,218                              |
| <b>H11</b>  | ERR031624 | 29,711,398                      | 20,635                              | 165,244                                  | 176,397                              | 572,143                              |
| <b>H12</b>  | ERR031625 | 28,969,101                      | 20,945                              | 200,421                                  | 171,711                              | 575,888                              |
| <b>H13</b>  | ERR031626 | 26,885,917                      | 20,628                              | 185,367                                  | 162,736                              | 555,543                              |
