# Supplementary material for: XomAnnotate: Analysis of Heterogeneous and Complex Exome- A Step towards Translational Medicine
Source: PubMed Central journal article supplement (PMC4408095; doi:10.1371/journal.pone.0123569), 2015-04-23
Supplement: pone.0123569.s007.pdf [file pone.0123569.s007.pdf]

## S2\_Table

**Detailed inventory of samples used for analysis:** The table gives detailed information about the samples used, distribution of variations detected by the various tools, the total number of variations considered for meta-analysis and the total number of KEGG pathway genes affected.

| Total Variations (SNP + SV) | Effected genes in KEGG Cancer Pathways |
|-----------------------------|----------------------------------------|
| 3,656                       | 487                                    |
| 2,858                       | 380                                    |
| 727                         | 101                                    |
| 650                         | 80                                     |
| 3,790                       | 464                                    |
| 2,844                       | 377                                    |
| 740                         | 94                                     |
| 782                         | 96                                     |
| 828                         | 102                                    |
| 3,638                       | 459                                    |
| 2,844                       | 376                                    |
| 3,325                       | 414                                    |
| 3,621                       | 429                                    |
| 928                         | 129                                    |
| 868                         | 118                                    |
| 1,111                       | 158                                    |
| 609                         | 74                                     |
| 2,027                       | 252                                    |
| 2,046                       | 264                                    |
| 466                         | 54                                     |
| 663                         | 77                                     |
| 3,051                       | 374                                    |
| 2,763                       | 344                                    |
| 2,437                       | 276                                    |
